# Supplementary material for: Global Functional Atlas of Escherichia coli Encompassing Previously Uncharacterized Proteins
Source: PLoS Biol. 2009 Apr 28;7(4):e1000096. doi: 10.1371/journal.pbio.1000096 (PMC2672614; doi:10.1371/journal.pbio.1000096)
Supplement: Table S4 — (75 KB XLS) [file pbio.1000096.st004.xls]

## Sheet: A_LCMS_reciprocal_PI
Table S4. - Reciprocal PI (LCMS)
The table shows the set of reciprocal PI generated in our study and their assigned confidence.
Note that the table is divided in two sheets (LCMS and MALDI)
PROTEIN_1	PROTEIN_2	Predicted.Probability
gntY__b3414__JW3377	elbB__b3209__JW3176	0.914645
elbB__b3209__JW3176	gntY__b3414__JW3377	0.914645
ybiS__b0819__JW0803	yohN__b2107__JW5346	0.89642
yohN__b2107__JW5346	ybiS__b0819__JW0803	0.89642
ygfA__b2912__JW2879	ndk__b2518__JW2502	0.872975
ndk__b2518__JW2502	ygfA__b2912__JW2879	0.818298
yhfG__b3362__JW3325	fic__b3361__JW3324	0.86887
fic__b3361__JW3324	yhfG__b3362__JW3325	0.86887
lpd__b0116__JW0112	aceF__b0115__JW0111	0.865897
aceF__b0115__JW0111	lpd__b0116__JW0112	0.865897
aceE__b0114__JW0110	lpd__b0116__JW0112	0.864518
lpd__b0116__JW0112	aceE__b0114__JW0110	0.864518
purL__b2557__JW2541	purA__b4177__JW4135	0.863406
purA__b4177__JW4135	purL__b2557__JW2541	0.863406
cspB__b1557__JW1549	cspA__b3556__JW3525	0.85839
cspA__b3556__JW3525	cspB__b1557__JW1549	0.85839
rpoA__b3295__JW3257	rpoB__b3987__JW3950	0.857331
rpoB__b3987__JW3950	rpoA__b3295__JW3257	0.857331
rpoZ__b3649__JW3624	rpoC__b3988__JW3951	0.857331
rpoC__b3988__JW3951	rpoZ__b3649__JW3624	0.826748
hupB__b0440__JW0430	hupA__b4000__JW3964	0.856667
hupA__b4000__JW3964	hupB__b0440__JW0430	0.84697
rpoB__b3987__JW3950	rpoC__b3988__JW3951	0.855706
rpoC__b3988__JW3951	rpoB__b3987__JW3950	0.824846
holC__b4259__JW4216	holD__b4372__JW4334	0.85527
holD__b4372__JW4334	holC__b4259__JW4216	0.829831
aceF__b0115__JW0111	aceE__b0114__JW0110	0.850694
aceE__b0114__JW0110	aceF__b0115__JW0111	0.850694
yfiD__b2579__JW2563	pflB__b0903__JW0886	0.850297
pflB__b0903__JW0886	yfiD__b2579__JW2563	0.850297
ynfG__b1589__JW1581	ynfF__b1588__JW5260	0.849511
ynfF__b1588__JW5260	ynfG__b1589__JW1581	0.828789
holC__b4259__JW4216	dnaQ__b0215__JW0205	0.849511
dnaQ__b0215__JW0205	holC__b4259__JW4216	0.817608
rpoZ__b3649__JW3624	rpoB__b3987__JW3950	0.847721
rpoB__b3987__JW3950	rpoZ__b3649__JW3624	0.847721
rpoA__b3295__JW3257	rpoC__b3988__JW3951	0.84737
rpoC__b3988__JW3951	rpoA__b3295__JW3257	0.815112
dnaE__b0184__JW0179	holC__b4259__JW4216	0.845567
holC__b4259__JW4216	dnaE__b0184__JW0179	0.845567
rne__b1084__JW1071	pnp__b3164__JW5851	0.845028
pnp__b3164__JW5851	rne__b1084__JW1071	0.845028
gyrB__b3699__JW5625	gyrA__b2231__JW2225	0.844317
gyrA__b2231__JW2225	gyrB__b3699__JW5625	0.844317
yliJ__b0838__JW0822	yliG__b0835__JW0819	0.841909
yliG__b0835__JW0819	yliJ__b0838__JW0822	0.841909
yeiG__b2154__JW2141	frmB__b0355__JW0346	0.841909
frmB__b0355__JW0346	yeiG__b2154__JW2141	0.28866
dmsD__b1591__JW5262	ynfF__b1588__JW5260	0.841909
ynfF__b1588__JW5260	dmsD__b1591__JW5262	0.734835
fdhE__b3891__JW3862	fdnG__b1474__JW1470	0.835338
fdnG__b1474__JW1470	fdhE__b3891__JW3862	0.835338
rpoD__b3067__JW3039	rpoB__b3987__JW3950	0.835338
rpoB__b3987__JW3950	rpoD__b3067__JW3039	0.835338
carA__b0032__JW0030	carB__b0033__JW0031	0.835338
carB__b0033__JW0031	carA__b0032__JW0030	0.835338
hybG__b2990__JW2958	hybC__b2994__JW2962	0.835338
hybC__b2994__JW2962	hybG__b2990__JW2958	0.00887153
rpoD__b3067__JW3039	rpoZ__b3649__JW3624	0.835338
rpoZ__b3649__JW3624	rpoD__b3067__JW3039	0.835338
accD__b2316__JW2313	accA__b0185__JW0180	0.833874
accA__b0185__JW0180	accD__b2316__JW2313	0.833874
rpoD__b3067__JW3039	rpoC__b3988__JW3951	0.833833
rpoC__b3988__JW3951	rpoD__b3067__JW3039	0.799392
lysS__b2890__JW2858	lysU__b4129__JW4090	0.832378
lysU__b4129__JW4090	lysS__b2890__JW2858	0.832378
ycbX__b0947__JW5126	cysJ__b2764__JW2734	0.832378
cysJ__b2764__JW2734	ycbX__b0947__JW5126	0.0585388
hsdR__b4350__JW4313	hsdM__b4349__JW4312	0.831435
hsdM__b4349__JW4312	hsdR__b4350__JW4313	0.802772
holE__b1842__JW1831	dnaX__b0470__JW0459	0.828789
dnaX__b0470__JW0459	holE__b1842__JW1831	0.817608
rpoA__b3295__JW3257	rpoD__b3067__JW3039	0.82855
rpoD__b3067__JW3039	rpoA__b3295__JW3257	0.82855
dnaE__b0184__JW0179	dnaQ__b0215__JW0205	0.827859
dnaQ__b0215__JW0205	dnaE__b0184__JW0179	0.792488
iscU__b2529__JW2513	iscS__b2530__JW2514	0.824573
iscS__b2530__JW2514	iscU__b2529__JW2513	0.824573
yajQ__b0426__JW5058	napD__b2207__JW2195	0.824573
napD__b2207__JW2195	yajQ__b0426__JW5058	0.813178
rpoA__b3295__JW3257	rpoZ__b3649__JW3624	0.822277
rpoZ__b3649__JW3624	rpoA__b3295__JW3257	0.268132
rhlB__b3780__JW3753	rne__b1084__JW1071	0.822277
rne__b1084__JW1071	rhlB__b3780__JW3753	0.822277
yccW__b0967__JW5898	yeeX__b2007__JW1989	0.821542
yeeX__b2007__JW1989	yccW__b0967__JW5898	0.821542
rne__b1084__JW1071	eno__b2779__JW2750	0.820114
eno__b2779__JW2750	rne__b1084__JW1071	0.820114
ygaM__b2672__JW2647	yfgB__b2517__JW2501	0.820114
yfgB__b2517__JW2501	ygaM__b2672__JW2647	0.808497
pnp__b3164__JW5851	eno__b2779__JW2750	0.817851
eno__b2779__JW2750	pnp__b3164__JW5851	0.817851
rpoD__b3067__JW3039	nusA__b3169__JW3138	0.81614
nusA__b3169__JW3138	rpoD__b3067__JW3039	0.81614
ygaM__b2672__JW2647	yqjD__b3098__JW3069	0.81614
yqjD__b3098__JW3069	ygaM__b2672__JW2647	0.81614
pnp__b3164__JW5851	rhlB__b3780__JW3753	0.81614
rhlB__b3780__JW3753	pnp__b3164__JW5851	0.81614
yhhP__b3470__JW3435	iscS__b2530__JW2514	0.81614
iscS__b2530__JW2514	yhhP__b3470__JW3435	0.81614
yacG__b0101__JW5008	gyrB__b3699__JW5625	0.812578
gyrB__b3699__JW5625	yacG__b0101__JW5008	0.812578
rluB__b1269__JW1261	rluC__b1086__JW1072	0.809367
rluC__b1086__JW1072	rluB__b1269__JW1261	0.809367
hypC__b2728__JW2698	hypD__b2729__JW2699	0.809367
hypD__b2729__JW2699	hypC__b2728__JW2698	0.797227
rluC__b1086__JW1072	yncE__b1452__JW1447	0.809367
yncE__b1452__JW1447	rluC__b1086__JW1072	0.204396
mukE__b0923__JW0906	mukB__b0924__JW0907	0.806459
mukB__b0924__JW0907	mukE__b0923__JW0906	0.806459
pgk__b2926__JW2893	pnp__b3164__JW5851	0.805549
pnp__b3164__JW5851	pgk__b2926__JW2893	0.805549
hepA__b0059__JW0058	rpoC__b3988__JW3951	0.805105
rpoC__b3988__JW3951	hepA__b0059__JW0058	0.766377
hupB__b0440__JW0430	malP__b3417__JW5689	0.804379
malP__b3417__JW5689	hupB__b0440__JW0430	0.681503
hupB__b0440__JW0430	hns__b1237__JW1225	0.803812
hns__b1237__JW1225	hupB__b0440__JW0430	0.0117726
cspE__b0623__JW0618	hfq__b4172__JW4130	0.803812
hfq__b4172__JW4130	cspE__b0623__JW0618	0.0199925
rluB__b1269__JW1261	ybcJ__b0528__JW5070	0.801395
ybcJ__b0528__JW5070	rluB__b1269__JW1261	0.801395
dnaQ__b0215__JW0205	dnaX__b0470__JW0459	0.801134
dnaX__b0470__JW0459	dnaQ__b0215__JW0205	0.801134
narJ__b1226__JW1217	narG__b1224__JW1215	0.799177
narG__b1224__JW1215	narJ__b1226__JW1217	0.799177
dnaE__b0184__JW0179	holE__b1842__JW1831	0.799177
holE__b1842__JW1831	dnaE__b0184__JW0179	0.759623
yccW__b0967__JW5898	rluB__b1269__JW1261	0.799177
rluB__b1269__JW1261	yccW__b0967__JW5898	0.78656
rhlB__b3780__JW3753	eno__b2779__JW2750	0.793846
eno__b2779__JW2750	rhlB__b3780__JW3753	0.0878298
nusG__b3982__JW3945	rho__b3783__JW3756	0.793846
rho__b3783__JW3756	nusG__b3982__JW3945	0.753566
ibpA__b3687__JW3664	pstB__b3725__JW3703	0.792488
pstB__b3725__JW3703	ibpA__b3687__JW3664	0.107344
rluB__b1269__JW1261	yeeX__b2007__JW1989	0.791887
yeeX__b2007__JW1989	rluB__b1269__JW1261	0.791887
secA__b0098__JW0096	tufA__b3339__JW3301	0.791693
tufA__b3339__JW3301	secA__b0098__JW0096	0.791693
rpoB__b3987__JW3950	nusG__b3982__JW3945	0.790089
nusG__b3982__JW3945	rpoB__b3987__JW3950	0.763464
hupB__b0440__JW0430	polA__b3863__JW3835	0.789898
polA__b3863__JW3835	hupB__b0440__JW0430	0.749091
hypB__b2727__JW2697	slyD__b3349__JW3311	0.78897
slyD__b3349__JW3311	hypB__b2727__JW2697	0.74804
ibpA__b3687__JW3664	ibpB__b3686__JW3663	0.788698
ibpB__b3686__JW3663	ibpA__b3687__JW3664	0.788698
rnr__b4179__JW5741	yibL__b3602__JW3577	0.787196
yibL__b3602__JW3577	rnr__b4179__JW5741	0.226554
yacL__b0119__JW0115	nusG__b3982__JW3945	0.786418
nusG__b3982__JW3945	yacL__b0119__JW0115	0.786418
hupA__b4000__JW3964	slyD__b3349__JW3311	0.78622
slyD__b3349__JW3311	hupA__b4000__JW3964	0.744929
hupB__b0440__JW0430	ihfB__b0912__JW0895	0.785946
ihfB__b0912__JW0895	hupB__b0440__JW0430	0.744619
nusA__b3169__JW3138	rpoB__b3987__JW3950	0.784167
rpoB__b3987__JW3950	nusA__b3169__JW3138	0.784167
rpoA__b3295__JW3257	nusG__b3982__JW3945	0.784167
nusG__b3982__JW3945	rpoA__b3295__JW3257	0.784167
prsA__b1207__JW1198	cobB__b1120__JW1106	0.783567
cobB__b1120__JW1106	prsA__b1207__JW1198	0.703477
ybcJ__b0528__JW5070	yibL__b3602__JW3577	0.782166
yibL__b3602__JW3577	ybcJ__b0528__JW5070	0.782166
cspC__b1823__JW1812	hfq__b4172__JW4130	0.779821
hfq__b4172__JW4130	cspC__b1823__JW1812	0.779821
acpP__b1094__JW1080	yiiD__b3888__JW3859	0.778766
yiiD__b3888__JW3859	acpP__b1094__JW1080	0.765243
cspD__b0880__JW0864	cspC__b1823__JW1812	0.77802
cspC__b1823__JW1812	cspD__b0880__JW0864	0.77802
yacL__b0119__JW0115	rpoA__b3295__JW3257	0.777779
rpoA__b3295__JW3257	yacL__b0119__JW0115	0.374086
nusA__b3169__JW3138	rpoA__b3295__JW3257	0.77731
rpoA__b3295__JW3257	nusA__b3169__JW3138	0.77731
acpP__b1094__JW1080	fabF__b1095__JW1081	0.77731
fabF__b1095__JW1081	acpP__b1094__JW1080	0.00295901
putA__b1014__JW0999	cspC__b1823__JW1812	0.775986
cspC__b1823__JW1812	putA__b1014__JW0999	0.733388
deaD__b3162__JW5531	cspC__b1823__JW1812	0.774778
cspC__b1823__JW1812	deaD__b3162__JW5531	0.73203
yacL__b0119__JW0115	rpoB__b3987__JW3950	0.773151
rpoB__b3987__JW3950	yacL__b0119__JW0115	0.773151
tufA__b3339__JW3301	tsf__b0170__JW0165	0.771416
tsf__b0170__JW0165	tufA__b3339__JW3301	0.728253
infC__b1718__JW5829	rpsE__b3303__JW3265	0.76956
rpsE__b3303__JW3265	infC__b1718__JW5829	0.76956
lpd__b0116__JW0112	sucA__b0726__JW0715	0.767615
sucA__b0726__JW0715	lpd__b0116__JW0112	0.767615
metK__b2942__JW2909	tufA__b3339__JW3301	0.764098
tufA__b3339__JW3301	metK__b2942__JW2909	0.764098
mukB__b0924__JW0907	tufA__b3339__JW3301	0.759494
tufA__b3339__JW3301	mukB__b0924__JW0907	0.745179
rpoC__b3988__JW3951	ygcP__b2768__JW2738	0.741447
ygcP__b2768__JW2738	rpoC__b3988__JW3951	0.741447
grpE__b2614__JW2594	dnaK__b0014__JW0013	0.727037
dnaK__b0014__JW0013	grpE__b2614__JW2594	0.727037
yfcZ__b2343__JW2340	secA__b0098__JW0096	0.712662
secA__b0098__JW0096	yfcZ__b2343__JW2340	0.114023
dnaK__b0014__JW0013	hscA__b2526__JW2510	0.70894
hscA__b2526__JW2510	dnaK__b0014__JW0013	0.0712325
rnhA__b0214__JW0204	topB__b1763__JW1752	0.692616
topB__b1763__JW1752	rnhA__b0214__JW0204	0.156412
ybcJ__b0528__JW5070	ihfB__b0912__JW0895	0.597795
ihfB__b0912__JW0895	ybcJ__b0528__JW5070	0.0885224
aceF__b0115__JW0111	yfcX__b2341__JW2338	0.453801
yfcX__b2341__JW2338	aceF__b0115__JW0111	0.397505
sohB__b1272__JW1264	rnpA__b3704__JW3681	0.332796
rnpA__b3704__JW3681	sohB__b1272__JW1264	0.036616
yefM__b2017__JW5835	rpoC__b3988__JW3951	0.210368
rpoC__b3988__JW3951	yefM__b2017__JW5835	0.00194419

## Sheet: B_MALDI_reciprocal_PI
Table S4. - Reciprocal PI (MALDI)
PROTEIN_1	PROTEIN_2	Predicted_Probability
tgt__b0406__JW0396	rluB__b1269__JW1261	0.999321
rluB__b1269__JW1261	tgt__b0406__JW0396	0.360361
parE__b3030__JW2998	infC__b1718__JW5829	0.998682
infC__b1718__JW5829	parE__b3030__JW2998	0.931371
rne__b1084__JW1071	pnp__b3164__JW5851	0.998501
pnp__b3164__JW5851	rne__b1084__JW1071	0.954985
fdhD__b3895__JW3866	iscS__b2530__JW2514	0.997513
iscS__b2530__JW2514	fdhD__b3895__JW3866	0.989972
ygfA__b2912__JW2879	ndk__b2518__JW2502	0.995919
ndk__b2518__JW2502	ygfA__b2912__JW2879	0.990853
nusA__b3169__JW3138	rpoA__b3295__JW3257	0.99461
rpoA__b3295__JW3257	nusA__b3169__JW3138	0.941624
pheT__b1713__JW1703	pheS__b1714__JW5277	0.994282
pheS__b1714__JW5277	pheT__b1713__JW1703	0.962518
sufB__b1683__JW5273	sufD__b1681__JW1671	0.994167
sufD__b1681__JW1671	sufB__b1683__JW5273	0.805674
yeaZ__b1807__JW1796	ygjD__b3064__JW3036	0.993975
ygjD__b3064__JW3036	yeaZ__b1807__JW1796	0.955974
cysI__b2763__JW2733	ycbX__b0947__JW5126	0.993923
ycbX__b0947__JW5126	cysI__b2763__JW2733	0.962451
yfcX__b2341__JW2338	yfcY__b2342__JW2339	0.993893
yfcY__b2342__JW2339	yfcX__b2341__JW2338	0.95731
rluC__b1086__JW1072	yfiF__b2581__JW2565	0.993874
yfiF__b2581__JW2565	rluC__b1086__JW1072	0.977992
ftsA__b0094__JW0092	murB__b3972__JW3940	0.993837
murB__b3972__JW3940	ftsA__b0094__JW0092	0.988955
ibpA__b3687__JW3664	ibpB__b3686__JW3663	0.99374
ibpB__b3686__JW3663	ibpA__b3687__JW3664	0.620457
hda__b2496__JW5397	murA__b3189__JW3156	0.993738
murA__b3189__JW3156	hda__b2496__JW5397	0.9926
rpoB__b3987__JW3950	rpoA__b3295__JW3257	0.993673
rpoA__b3295__JW3257	rpoB__b3987__JW3950	0.554461
rpoC__b3988__JW3951	rpoA__b3295__JW3257	0.993616
rpoA__b3295__JW3257	rpoC__b3988__JW3951	0.557237
hscB__b2527__JW2511	clpX__b0438__JW0428	0.993392
clpX__b0438__JW0428	hscB__b2527__JW2511	0.760097
yfiF__b2581__JW2565	rluB__b1269__JW1261	0.993356
rluB__b1269__JW1261	yfiF__b2581__JW2565	0.988727
iscU__b2529__JW2513	iscS__b2530__JW2514	0.993308
iscS__b2530__JW2514	iscU__b2529__JW2513	0.98175
topB__b1763__JW1752	ssb__b4059__JW4020	0.993308
ssb__b4059__JW4020	topB__b1763__JW1752	0.947111
rne__b1084__JW1071	eno__b2779__JW2750	0.99302
eno__b2779__JW2750	rne__b1084__JW1071	0.710643
lpxA__b0181__JW0176	prsA__b1207__JW1198	0.992795
prsA__b1207__JW1198	lpxA__b0181__JW0176	0.636569
fusA__b3340__JW3302	nadE__b1740__JW1729	0.992725
nadE__b1740__JW1729	fusA__b3340__JW3302	0.953817
rpoD__b3067__JW3039	rpoA__b3295__JW3257	0.992654
rpoA__b3295__JW3257	rpoD__b3067__JW3039	0.922211
dnaE__b0184__JW0179	holB__b1099__JW1085	0.99262
holB__b1099__JW1085	dnaE__b0184__JW0179	0.810718
plsB__b4041__JW4001	ispA__b0421__JW0411	0.992569
ispA__b0421__JW0411	plsB__b4041__JW4001	0.241449
yedO__b1919__JW5313	sucB__b0727__JW0716	0.992526
sucB__b0727__JW0716	yedO__b1919__JW5313	0.776061
leuS__b0642__JW0637	prfB__b2891__JW5847	0.992444
prfB__b2891__JW5847	leuS__b0642__JW0637	0.94546
ycbY__b0948__JW0931	yfiF__b2581__JW2565	0.99238
yfiF__b2581__JW2565	ycbY__b0948__JW0931	0.95795
pnp__b3164__JW5851	eno__b2779__JW2750	0.992219
eno__b2779__JW2750	pnp__b3164__JW5851	0.955084
acpP__b1094__JW1080	yiiD__b3888__JW3859	0.992072
yiiD__b3888__JW3859	acpP__b1094__JW1080	0.743372
deaD__b3162__JW5531	yfiF__b2581__JW2565	0.992046
yfiF__b2581__JW2565	deaD__b3162__JW5531	0.954156
polA__b3863__JW3835	kdsA__b1215__JW1206	0.99191
kdsA__b1215__JW1206	polA__b3863__JW3835	0.749476
fdnG__b1474__JW1470	fdhE__b3891__JW3862	0.991835
fdhE__b3891__JW3862	fdnG__b1474__JW1470	0.782555
cysJ__b2764__JW2734	ycbX__b0947__JW5126	0.991809
ycbX__b0947__JW5126	cysJ__b2764__JW2734	0.894172
yacL__b0119__JW0115	nusG__b3982__JW3945	0.991773
nusG__b3982__JW3945	yacL__b0119__JW0115	0.402341
pinR__b1374__JW1368	nagK,ycfX__b1119__JW1105	0.991484
nagK,ycfX__b1119__JW1105	pinR__b1374__JW1368	0.902706
carB__b0033__JW0031	carA__b0032__JW0030	0.991217
carA__b0032__JW0030	carB__b0033__JW0031	0.811506
yciH__b1282__JW1274	pinR__b1374__JW1368	0.991152
pinR__b1374__JW1368	yciH__b1282__JW1274	0.264643
ileS__b0026__JW0024	map__b0168__JW0163	0.991067
map__b0168__JW0163	ileS__b0026__JW0024	0.22672
narG__b1224__JW1215	narJ__b1226__JW1217	0.990955
narJ__b1226__JW1217	narG__b1224__JW1215	0.780923
rne__b1084__JW1071	rhlB__b3780__JW3753	0.99083
rhlB__b3780__JW3753	rne__b1084__JW1071	0.789175
fusA__b3340__JW3302	murI__b3967__JW5550	0.990783
murI__b3967__JW5550	fusA__b3340__JW3302	0.948744
recJ__b2892__JW2860	ssb__b4059__JW4020	0.990512
ssb__b4059__JW4020	recJ__b2892__JW2860	0.954764
cobB__b1120__JW1106	prsA__b1207__JW1198	0.990372
prsA__b1207__JW1198	cobB__b1120__JW1106	0.747624
malQ__b3416__JW3379	nagC__b0676__JW0662	0.990125
nagC__b0676__JW0662	malQ__b3416__JW3379	0.19217
ybjX__b0877__JW0861	rfaD__b3619__JW3594	0.990098
rfaD__b3619__JW3594	ybjX__b0877__JW0861	0.718894
rpoZ__b3649__JW3624	rpoA__b3295__JW3257	0.990063
rpoA__b3295__JW3257	rpoZ__b3649__JW3624	0.901174
deaD__b3162__JW5531	rluB__b1269__JW1261	0.989968
rluB__b1269__JW1261	deaD__b3162__JW5531	0.909054
rfaE__b3052__JW3024	yniA__b1725__JW1714	0.989795
yniA__b1725__JW1714	rfaE__b3052__JW3024	0.847977
tufA__b3339__JW3301	tsf__b0170__JW0165	0.989753
tsf__b0170__JW0165	tufA__b3339__JW3301	0.700321
metK__b2942__JW2909	dnaJ__b0015__JW0014	0.989734
dnaJ__b0015__JW0014	metK__b2942__JW2909	0.979544
pflB__b0903__JW0886	tpiA__b3919__JW3890	0.989692
tpiA__b3919__JW3890	pflB__b0903__JW0886	0.956757
secA__b0098__JW0096	mreB__b3251__JW3220	0.989623
mreB__b3251__JW3220	secA__b0098__JW0096	0.735212
holC__b4259__JW4216	dnaQ__b0215__JW0205	0.989459
dnaQ__b0215__JW0205	holC__b4259__JW4216	0.988899
yfiD__b2579__JW2563	tpiA__b3919__JW3890	0.989451
tpiA__b3919__JW3890	yfiD__b2579__JW2563	0.969782
yfgB__b2517__JW2501	rluB__b1269__JW1261	0.989411
rluB__b1269__JW1261	yfgB__b2517__JW2501	0.685667
fusA__b3340__JW3302	murF__b0086__JW0084	0.989371
murF__b0086__JW0084	fusA__b3340__JW3302	0.951379
deaD__b3162__JW5531	rluC__b1086__JW1072	0.989219
rluC__b1086__JW1072	deaD__b3162__JW5531	0.952662
tpiA__b3919__JW3890	pepT__b1127__JW1113	0.988815
pepT__b1127__JW1113	tpiA__b3919__JW3890	0.583234
leuS__b0642__JW0637	ppa__b4226__JW4185	0.988629
ppa__b4226__JW4185	leuS__b0642__JW0637	0.955445
fusA__b3340__JW3302	murG__b0090__JW0088	0.988388
murG__b0090__JW0088	fusA__b3340__JW3302	0.914782
pnp__b3164__JW5851	rhlB__b3780__JW3753	0.988379
rhlB__b3780__JW3753	pnp__b3164__JW5851	0.951793
murE__b0085__JW0083	ftsE__b3463__JW3428	0.988214
ftsE__b3463__JW3428	murE__b0085__JW0083	0.957117
talA__b2464__JW2448	gldA__b3945__JW5556	0.988156
gldA__b3945__JW5556	talA__b2464__JW2448	0.985331
yfaY__b2249__JW2243	gatD__b2091__JW2075	0.98815
gatD__b2091__JW2075	yfaY__b2249__JW2243	0.961452
dnaE__b0184__JW0179	dnaQ__b0215__JW0205	0.988054
dnaQ__b0215__JW0205	dnaE__b0184__JW0179	0.815725
prsA__b1207__JW1198	lpxB__b0182__JW0177	0.988004
lpxB__b0182__JW0177	prsA__b1207__JW1198	0.976212
narG__b1224__JW1215	dnaJ__b0015__JW0014	0.987926
dnaJ__b0015__JW0014	narG__b1224__JW1215	0.766502
rpoB__b3987__JW3950	nusG__b3982__JW3945	0.987385
nusG__b3982__JW3945	rpoB__b3987__JW3950	0.463107
hypC__b2728__JW2698	hypD__b2729__JW2699	0.987174
hypD__b2729__JW2699	hypC__b2728__JW2698	0.739937
lysS__b2890__JW2858	tdcD__b3115__JW5806	0.987092
tdcD__b3115__JW5806	lysS__b2890__JW2858	0.953895
mreB__b3251__JW3220	pstB__b3725__JW3703	0.987078
pstB__b3725__JW3703	mreB__b3251__JW3220	0.948259
rluB__b1269__JW1261	prsA__b1207__JW1198	0.986642
prsA__b1207__JW1198	rluB__b1269__JW1261	0.735367
dnaJ__b0015__JW0014	mreB__b3251__JW3220	0.986602
mreB__b3251__JW3220	dnaJ__b0015__JW0014	0.982927
spoT__b3650__JW3625	rluB__b1269__JW1261	0.986262
rluB__b1269__JW1261	spoT__b3650__JW3625	0.900075
recQ__b3822__JW5855	ssb__b4059__JW4020	0.985567
ssb__b4059__JW4020	recQ__b3822__JW5855	0.935752
gyrA__b2231__JW2225	mreB__b3251__JW3220	0.985476
mreB__b3251__JW3220	gyrA__b2231__JW2225	0.827939
parE__b3030__JW2998	fimB__b4312__JW4275	0.984396
fimB__b4312__JW4275	parE__b3030__JW2998	0.941839
ligA__b2411__JW2403	prsA__b1207__JW1198	0.983782
prsA__b1207__JW1198	ligA__b2411__JW2403	0.950044
nusG__b3982__JW3945	rpoA__b3295__JW3257	0.983763
rpoA__b3295__JW3257	nusG__b3982__JW3945	0.982737
pssA__b2585__JW2569	yfiF__b2581__JW2565	0.983235
yfiF__b2581__JW2565	pssA__b2585__JW2569	0.587293
sucA__b0726__JW0715	sucB__b0727__JW0716	0.983091
sucB__b0727__JW0716	sucA__b0726__JW0715	0.776061
nudG__b1759__JW1748	rnhA__b0214__JW0204	0.982736
rnhA__b0214__JW0204	nudG__b1759__JW1748	0.502992
rpoC__b3988__JW3951	nusG__b3982__JW3945	0.981878
nusG__b3982__JW3945	rpoC__b3988__JW3951	0.460691
tufB__b3980__JW3943	tsf__b0170__JW0165	0.981373
tsf__b0170__JW0165	tufB__b3980__JW3943	0.922153
ybeZ__b0660__JW0657	rluB__b1269__JW1261	0.980747
rluB__b1269__JW1261	ybeZ__b0660__JW0657	0.167521
miaB__b0661__JW0658	mreB__b3251__JW3220	0.98064
mreB__b3251__JW3220	miaB__b0661__JW0658	0.633969
hfq__b4172__JW4130	rluB__b1269__JW1261	0.980053
rluB__b1269__JW1261	hfq__b4172__JW4130	0.34451
pnp__b3164__JW5851	rluB__b1269__JW1261	0.979401
rluB__b1269__JW1261	pnp__b3164__JW5851	0.204876
tufB__b3980__JW3943	mreB__b3251__JW3220	0.979226
mreB__b3251__JW3220	tufB__b3980__JW3943	0.747239
lhr__b1653__JW1645	rpoA__b3295__JW3257	0.976679
rpoA__b3295__JW3257	lhr__b1653__JW1645	0.295177
crr__b2417__JW2410	frsA__b0239__JW0229	0.976252
frsA__b0239__JW0229	crr__b2417__JW2410	0.837642
rnr__b4179__JW5741	rluC__b1086__JW1072	0.976191
rluC__b1086__JW1072	rnr__b4179__JW5741	0.955161
nagC__b0676__JW0662	minD__b1175__JW1164	0.975001
minD__b1175__JW1164	nagC__b0676__JW0662	0.200851
srmB__b2576__JW2560	dnaJ__b0015__JW0014	0.974372
dnaJ__b0015__JW0014	srmB__b2576__JW2560	0.736068
holB__b1099__JW1085	yfiF__b2581__JW2565	0.973995
yfiF__b2581__JW2565	holB__b1099__JW1085	0.539131
pcnB__b0143__JW5808	rluB__b1269__JW1261	0.972794
rluB__b1269__JW1261	pcnB__b0143__JW5808	0.633014
malT__b3418__JW3381	dnaJ__b0015__JW0014	0.971333
dnaJ__b0015__JW0014	malT__b3418__JW3381	0.698302
leuS__b0642__JW0637	prsA__b1207__JW1198	0.970753
prsA__b1207__JW1198	leuS__b0642__JW0637	0.942199
recJ__b2892__JW2860	rnhA__b0214__JW0204	0.969287
rnhA__b0214__JW0204	recJ__b2892__JW2860	0.94442
hscA__b2526__JW2510	iscU__b2529__JW2513	0.968339
iscU__b2529__JW2513	hscA__b2526__JW2510	0.960765
rnc__b2567__JW2551	rnb__b1286__JW1279	0.968019
rnb__b1286__JW1279	rnc__b2567__JW2551	0.318764
ymfB__b1134__JW1120	yihQ__b3878__JW3849	0.966015
yihQ__b3878__JW3849	ymfB__b1134__JW1120	0.847101
narG__b1224__JW1215	mreB__b3251__JW3220	0.965049
mreB__b3251__JW3220	narG__b1224__JW1215	0.790243
mreB__b3251__JW3220	ftsZ__b0095__JW0093	0.962749
ftsZ__b0095__JW0093	mreB__b3251__JW3220	0.729193
ldcC__b0186__JW0181	cadA__b4131__JW4092	0.961949
cadA__b4131__JW4092	ldcC__b0186__JW0181	0.956241
ypdD__b2383__JW2380	der__b2511__JW5403	0.961274
der__b2511__JW5403	ypdD__b2383__JW2380	0.957884
cysJ__b2764__JW2734	cysI__b2763__JW2733	0.960421
cysI__b2763__JW2733	cysJ__b2764__JW2734	0.951041
rpoZ__b3649__JW3624	rpoD__b3067__JW3039	0.958602
rpoD__b3067__JW3039	rpoZ__b3649__JW3624	0.787331
crr__b2417__JW2410	cysI__b2763__JW2733	0.958598
cysI__b2763__JW2733	crr__b2417__JW2410	0.787733
yfiD__b2579__JW2563	pflB__b0903__JW0886	0.95848
pflB__b0903__JW0886	yfiD__b2579__JW2563	0.75378
holD__b4372__JW4334	dnaQ__b0215__JW0205	0.957808
dnaQ__b0215__JW0205	holD__b4372__JW4334	0.568663
dnaK__b0014__JW0013	grpE__b2614__JW2594	0.957632
grpE__b2614__JW2594	dnaK__b0014__JW0013	0.949622
rluB__b1269__JW1261	rnr__b4179__JW5741	0.956836
rnr__b4179__JW5741	rluB__b1269__JW1261	0.251113
deaD__b3162__JW5531	srmB__b2576__JW2560	0.956757
srmB__b2576__JW2560	deaD__b3162__JW5531	0.265494
dcm__b1961__JW1944	parE__b3030__JW2998	0.956727
parE__b3030__JW2998	dcm__b1961__JW1944	0.953975
rnr__b4179__JW5741	rplD__b3319__JW3281	0.956319
rplD__b3319__JW3281	rnr__b4179__JW5741	0.736871
rluC__b1086__JW1072	pssA__b2585__JW2569	0.956024
pssA__b2585__JW2569	rluC__b1086__JW1072	0.463094
deaD__b3162__JW5531	rnr__b4179__JW5741	0.95552
rnr__b4179__JW5741	deaD__b3162__JW5531	0.883417
infC__b1718__JW5829	parC__b3019__JW2987	0.955252
parC__b3019__JW2987	infC__b1718__JW5829	0.925834
lhr__b1653__JW1645	ompA__b0957__JW0940	0.955146
ompA__b0957__JW0940	lhr__b1653__JW1645	0.188524
yacG__b0101__JW5008	gyrB__b3699__JW5625	0.95453
gyrB__b3699__JW5625	yacG__b0101__JW5008	0.730185
recB__b2820__JW2788	recD__b2819__JW2787	0.953904
recD__b2819__JW2787	recB__b2820__JW2788	0.795812
atpA__b3734__JW3712	topB__b1763__JW1752	0.953847
topB__b1763__JW1752	atpA__b3734__JW3712	0.201412
tyrR__b1323__JW1316	atpA__b3734__JW3712	0.953544
atpA__b3734__JW3712	tyrR__b1323__JW1316	0.952452
murE__b0085__JW0083	fusA__b3340__JW3302	0.952993
fusA__b3340__JW3302	murE__b0085__JW0083	0.94903
gadB__b1493__JW1488	dnaK__b0014__JW0013	0.952815
dnaK__b0014__JW0013	gadB__b1493__JW1488	0.608612
spoT__b3650__JW3625	srmB__b2576__JW2560	0.95277
srmB__b2576__JW2560	spoT__b3650__JW3625	0.374315
tufB__b3980__JW3943	tufA__b3339__JW3301	0.951501
tufA__b3339__JW3301	tufB__b3980__JW3943	0.91168
hsdR__b4350__JW4313	hsdM__b4349__JW4312	0.951085
hsdM__b4349__JW4312	hsdR__b4350__JW4313	0.757591
rluB__b1269__JW1261	srmB__b2576__JW2560	0.950842
srmB__b2576__JW2560	rluB__b1269__JW1261	0.423459
gadA__b3517__JW3485	dnaK__b0014__JW0013	0.950487
dnaK__b0014__JW0013	gadA__b3517__JW3485	0.647462
gadA__b3517__JW3485	gadB__b1493__JW1488	0.95002
gadB__b1493__JW1488	gadA__b3517__JW3485	0.692171
topB__b1763__JW1752	recQ__b3822__JW5855	0.949893
recQ__b3822__JW5855	topB__b1763__JW1752	0.223396
topA__b1274__JW1266	recQ__b3822__JW5855	0.949811
recQ__b3822__JW5855	topA__b1274__JW1266	0.929839
cedA__b1731__JW1720	rpoZ__b3649__JW3624	0.949288
rpoZ__b3649__JW3624	cedA__b1731__JW1720	0.756305
gyrB__b3699__JW5625	gyrA__b2231__JW2225	0.949186
gyrA__b2231__JW2225	gyrB__b3699__JW5625	0.921945
ybeX__b0658__JW0655	rfaE__b3052__JW3024	0.947523
rfaE__b3052__JW3024	ybeX__b0658__JW0655	0.607267
rpoB__b3987__JW3950	nusA__b3169__JW3138	0.947498
nusA__b3169__JW3138	rpoB__b3987__JW3950	0.574746
parE__b3030__JW2998	yfcD__b2299__JW2296	0.947387
yfcD__b2299__JW2296	parE__b3030__JW2998	0.912058
prfA__b1211__JW1202	leuS__b0642__JW0637	0.946994
leuS__b0642__JW0637	prfA__b1211__JW1202	0.548846
cheY__b1882__JW1871	parE__b3030__JW2998	0.946225
parE__b3030__JW2998	cheY__b1882__JW1871	0.231878
secB__b3609__JW3584	lon__b0439__JW0429	0.946132
lon__b0439__JW0429	secB__b3609__JW3584	0.27307
ydjQ__b1741__JW1730	groS__b4142__JW4102	0.94462
groS__b4142__JW4102	ydjQ__b1741__JW1730	0.210961
trmE__b3706__JW3684	gidA__b3741__JW3719	0.944279
gidA__b3741__JW3719	trmE__b3706__JW3684	0.90697
rnr__b4179__JW5741	yfiF__b2581__JW2565	0.942789
yfiF__b2581__JW2565	rnr__b4179__JW5741	0.607446
cbpA__b1000__JW0985	clpB__b2592__JW2573	0.942752
clpB__b2592__JW2573	cbpA__b1000__JW0985	0.357176
prsA__b1207__JW1198	srmB__b2576__JW2560	0.941573
srmB__b2576__JW2560	prsA__b1207__JW1198	0.340155
parC__b3019__JW2987	gyrA__b2231__JW2225	0.937697
gyrA__b2231__JW2225	parC__b3019__JW2987	0.185048
dnaE__b0184__JW0179	holD__b4372__JW4334	0.935032
holD__b4372__JW4334	dnaE__b0184__JW0179	0.809948
rpoB__b3987__JW3950	rpoD__b3067__JW3039	0.934513
rpoD__b3067__JW3039	rpoB__b3987__JW3950	0.467039
pstB__b3725__JW3703	groS__b4142__JW4102	0.934337
groS__b4142__JW4102	pstB__b3725__JW3703	0.169237
ssb__b4059__JW4020	recG__b3652__JW3627	0.934248
recG__b3652__JW3627	ssb__b4059__JW4020	0.741458
spoT__b3650__JW3625	deaD__b3162__JW5531	0.933176
deaD__b3162__JW5531	spoT__b3650__JW3625	0.320474
phnK__b4097__JW5727	hemY__b3802__JW3774	0.932101
hemY__b3802__JW3774	phnK__b4097__JW5727	0.286911
narG__b1224__JW1215	narY__b1467__JW1462	0.929602
narY__b1467__JW1462	narG__b1224__JW1215	0.60878
ompA__b0957__JW0940	nuoC__b2286__JW5375	0.928142
nuoC__b2286__JW5375	ompA__b0957__JW0940	0.2663
topB__b1763__JW1752	topA__b1274__JW1266	0.928084
topA__b1274__JW1266	topB__b1763__JW1752	0.391426
secA__b0098__JW0096	tufB__b3980__JW3943	0.927895
tufB__b3980__JW3943	secA__b0098__JW0096	0.763995
gltB__b3212__JW3179	gltD__b3213__JW3180	0.92774
gltD__b3213__JW3180	gltB__b3212__JW3179	0.753022
cydC__b0886__JW0869	cydD__b0887__JW0870	0.926615
cydD__b0887__JW0870	cydC__b0886__JW0869	0.856737
rpoC__b3988__JW3951	nusA__b3169__JW3138	0.92658
nusA__b3169__JW3138	rpoC__b3988__JW3951	0.47111
rpoB__b3987__JW3950	rpoZ__b3649__JW3624	0.92349
rpoZ__b3649__JW3624	rpoB__b3987__JW3950	0.821095
recE__b1350__JW1344	ligA__b2411__JW2403	0.913201
ligA__b2411__JW2403	recE__b1350__JW1344	0.766174
recJ__b2892__JW2860	topB__b1763__JW1752	0.913019
topB__b1763__JW1752	recJ__b2892__JW2860	0.206406
cheW__b1887__JW1876	parE__b3030__JW2998	0.912762
parE__b3030__JW2998	cheW__b1887__JW1876	0.704479
yjeE__b4168__JW4126	yjeF__b4167__JW4125	0.912254
yjeF__b4167__JW4125	yjeE__b4168__JW4126	0.555843
mreB__b3251__JW3220	groS__b4142__JW4102	0.911887
groS__b4142__JW4102	mreB__b3251__JW3220	0.366906
recD__b2819__JW2787	groS__b4142__JW4102	0.901985
groS__b4142__JW4102	recD__b2819__JW2787	0.202204
srmB__b2576__JW2560	rplD__b3319__JW3281	0.90078
rplD__b3319__JW3281	srmB__b2576__JW2560	0.736596
hfq__b4172__JW4130	selB__b3590__JW3563	0.898436
selB__b3590__JW3563	hfq__b4172__JW4130	0.212171
mukB__b0924__JW0907	mukE__b0923__JW0906	0.888688
mukE__b0923__JW0906	mukB__b0924__JW0907	0.468463
rpoC__b3988__JW3951	rpoZ__b3649__JW3624	0.88797
rpoZ__b3649__JW3624	rpoC__b3988__JW3951	0.454315
mreB__b3251__JW3220	nuoC__b2286__JW5375	0.887851
nuoC__b2286__JW5375	mreB__b3251__JW3220	0.723037
rpoB__b3987__JW3950	hepA__b0059__JW0058	0.877389
hepA__b0059__JW0058	rpoB__b3987__JW3950	0.485082
dnaE__b0184__JW0179	holC__b4259__JW4216	0.87394
holC__b4259__JW4216	dnaE__b0184__JW0179	0.802988
mreB__b3251__JW3220	pnp__b3164__JW5851	0.873662
pnp__b3164__JW5851	mreB__b3251__JW3220	0.446443
deaD__b3162__JW5531	rplD__b3319__JW3281	0.86539
rplD__b3319__JW3281	deaD__b3162__JW5531	0.743646
relB__b1564__JW1556	rep__b3778__JW5604	0.861948
rep__b3778__JW5604	relB__b1564__JW1556	0.269454
secA__b0098__JW0096	metK__b2942__JW2909	0.861142
metK__b2942__JW2909	secA__b0098__JW0096	0.654591
ftsZ__b0095__JW0093	fusA__b3340__JW3302	0.843681
fusA__b3340__JW3302	ftsZ__b0095__JW0093	0.183519
nuoC__b2286__JW5375	metK__b2942__JW2909	0.834624
metK__b2942__JW2909	nuoC__b2286__JW5375	0.19137
lpxD__b0179__JW0174	cbpA__b1000__JW0985	0.832638
cbpA__b1000__JW0985	lpxD__b0179__JW0174	0.614914
tufB__b3980__JW3943	metK__b2942__JW2909	0.821132
metK__b2942__JW2909	tufB__b3980__JW3943	0.711997
nagK,ycfX__b1119__JW1105	pinQ__b1545__JW1538	0.819241
pinQ__b1545__JW1538	nagK,ycfX__b1119__JW1105	0.794738
yjgR__b4263__JW4220	yncB__b1449__JW5907	0.819155
yncB__b1449__JW5907	yjgR__b4263__JW4220	0.699382
malT__b3418__JW3381	mreB__b3251__JW3220	0.81308
mreB__b3251__JW3220	malT__b3418__JW3381	0.787077
rpoB__b3987__JW3950	rpoN__b3202__JW3169	0.810887
rpoN__b3202__JW3169	rpoB__b3987__JW3950	0.453434
hepA__b0059__JW0058	rpoA__b3295__JW3257	0.787489
rpoA__b3295__JW3257	hepA__b0059__JW0058	0.74161
holD__b4372__JW4334	holC__b4259__JW4216	0.786712
holC__b4259__JW4216	holD__b4372__JW4334	0.347629
sufB__b1683__JW5273	sufC__b1682__JW1672	0.783754
sufC__b1682__JW1672	sufB__b1683__JW5273	0.783754
rluC__b1086__JW1072	hrpA__b1413__JW5905	0.783729
hrpA__b1413__JW5905	rluC__b1086__JW1072	0.267926
uspG__b0607__JW0600	secA__b0098__JW0096	0.776279
secA__b0098__JW0096	uspG__b0607__JW0600	0.189283
yhiF__b3507__JW3475	rcsB__b2217__JW2205	0.776061
rcsB__b2217__JW2205	yhiF__b3507__JW3475	0.674293
accA__b0185__JW0180	accD__b2316__JW2313	0.774703
accD__b2316__JW2313	accA__b0185__JW0180	0.774703
deaD__b3162__JW5531	dnaJ__b0015__JW0014	0.773241
dnaJ__b0015__JW0014	deaD__b3162__JW5531	0.735004
ligA__b2411__JW2403	leuS__b0642__JW0637	0.753022
leuS__b0642__JW0637	ligA__b2411__JW2403	0.57369
rplD__b3319__JW3281	rpoC__b3988__JW3951	0.743597
rpoC__b3988__JW3951	rplD__b3319__JW3281	0.743597
rplD__b3319__JW3281	secA__b0098__JW0096	0.739755
secA__b0098__JW0096	rplD__b3319__JW3281	0.19948
rpoC__b3988__JW3951	hepA__b0059__JW0058	0.731141
hepA__b0059__JW0058	rpoC__b3988__JW3951	0.458499
dnaA__b3702__JW3679	dnaJ__b0015__JW0014	0.730723
dnaJ__b0015__JW0014	dnaA__b3702__JW3679	0.18696
dnaJ__b0015__JW0014	nuoC__b2286__JW5375	0.72967
nuoC__b2286__JW5375	dnaJ__b0015__JW0014	0.234025
rpoB__b3987__JW3950	hupA__b4000__JW3964	0.722427
hupA__b4000__JW3964	rpoB__b3987__JW3950	0.255109
dnaK__b0014__JW0013	alaS__b2697__JW2667	0.72142
alaS__b2697__JW2667	dnaK__b0014__JW0013	0.58226
clpA__b0882__JW0866	rpoB__b3987__JW3950	0.720624
rpoB__b3987__JW3950	clpA__b0882__JW0866	0.230076
greB__b3406__JW3369	rpoA__b3295__JW3257	0.720379
rpoA__b3295__JW3257	greB__b3406__JW3369	0.720379
rpoB__b3987__JW3950	rpoH__b3461__JW3426	0.717572
rpoH__b3461__JW3426	rpoB__b3987__JW3950	0.400704
greB__b3406__JW3369	rpoC__b3988__JW3951	0.716193
rpoC__b3988__JW3951	greB__b3406__JW3369	0.381401
secB__b3609__JW3584	secA__b0098__JW0096	0.714329
secA__b0098__JW0096	secB__b3609__JW3584	0.491617
rpoB__b3987__JW3950	rpoC__b3988__JW3951	0.697365
rpoC__b3988__JW3951	rpoB__b3987__JW3950	0.554635
selB__b3590__JW3563	srmB__b2576__JW2560	0.682787
srmB__b2576__JW2560	selB__b3590__JW3563	0.331075
rpsE__b3303__JW3265	tufB__b3980__JW3943	0.67272
tufB__b3980__JW3943	rpsE__b3303__JW3265	0.245831
nusA__b3169__JW3138	tufA__b3339__JW3301	0.662034
tufA__b3339__JW3301	nusA__b3169__JW3138	0.158838
rpoC__b3988__JW3951	rpoD__b3067__JW3039	0.635754
rpoD__b3067__JW3039	rpoC__b3988__JW3951	0.463421
ftsZ__b0095__JW0093	dnaJ__b0015__JW0014	0.597821
dnaJ__b0015__JW0014	ftsZ__b0095__JW0093	0.253498
metK__b2942__JW2909	glyQ__b3560__JW3531	0.581455
glyQ__b3560__JW3531	metK__b2942__JW2909	0.185256
uup__b0949__JW0932	yfbG__b2255__JW2249	0.498324
yfbG__b2255__JW2249	uup__b0949__JW0932	0.456244
gyrA__b2231__JW2225	nuoC__b2286__JW5375	0.487486
nuoC__b2286__JW5375	gyrA__b2231__JW2225	0.167314
rnr__b4179__JW5741	tgt__b0406__JW0396	0.475649
tgt__b0406__JW0396	rnr__b4179__JW5741	0.170032
ftsZ__b0095__JW0093	rpoA__b3295__JW3257	0.440839
rpoA__b3295__JW3257	ftsZ__b0095__JW0093	0.17437
ileS__b0026__JW0024	secA__b0098__JW0096	0.411522
secA__b0098__JW0096	ileS__b0026__JW0024	0.198366
dnaJ__b0015__JW0014	secA__b0098__JW0096	0.380002
secA__b0098__JW0096	dnaJ__b0015__JW0014	0.273808
fdhE__b3891__JW3862	fdhD__b3895__JW3866	0.365482
fdhD__b3895__JW3866	fdhE__b3891__JW3862	0.307097
rluB__b1269__JW1261	rpoA__b3295__JW3257	0.354799
rpoA__b3295__JW3257	rluB__b1269__JW1261	0.246986
deaD__b3162__JW5531	rpoA__b3295__JW3257	0.299887
rpoA__b3295__JW3257	deaD__b3162__JW5531	0.18865
slyD__b3349__JW3311	pflB__b0903__JW0886	0.297551
pflB__b0903__JW0886	slyD__b3349__JW3311	0.202748
tufB__b3980__JW3943	accC__b3256__JW3224	0.255116
accC__b3256__JW3224	tufB__b3980__JW3943	0.166605
